# Supplementary material
Source: HighWire-hosted journal article supplement (https://bmjopenquality.bmj.com/highwire/filestream/136151/field_highwire_adjunct_files/0/ds3157.docx)
Supplement: ds3157.docx [file ds3157.docx]

**THE FOLLOWING QUESTIONNAIRE IS ANONYMOUS**

1. Please tick one of the boxes for the question below:

**Over the past two years I have missed appointment(s) with my psychiatrist or care coordinator on:**

□One Occasion

□ Two Occasions

□ More than two occasions

□ I have never missed an appointment with my psychiatrist/ care coordinator.

1. Please tick *as many boxes as you feel applicable to you* in terms of the question below.

**If you have missed at least one appointment, what do you think was the reason?**

□ I forgot I had an appointment.

□ I wasn’t taking my medication and was too embarrassed to tell my psychiatrist/ care coordinator.

□ I had a previous bad experience with appointments.

□ It was too expensive for me to attend the appointment.

□ I had no means of transport to attend the appointment.

□ I do not like the way my psychiatrist/ care coordinator sees me as a person with medical illness.

□ The appointment I was given was not convenient for me.

□ The appointments were very infrequent.

□ I felt there was a stigma for me when people saw me entering the building.

□ I did not like my psychiatrist/ care coordinator. Reason………………………………………………..

□ I did not find the appointments helpful.

□ I do not have a mental illness.

□ I have a mental illness but I don’t think I need to see my psychiatrist/ care coordinator.

□ Other reason…………………………………………………………………………………………………………………..

3. **What can we do differently to help you attend your appointments?**

……………………………………………………………………………………………………………………………………………………

*Thank you very much for taking the time to complete*
